1 **Abstract:**

2

3 *Background:* Insights from neuroimaging-based biomarker research have not yet translated into  
4 clinical practice. This translational gap could be because of a focus of psychiatric biomarker  
5 research on diagnostic classification, rather than on prediction of transdiagnostic psychiatric  
6 symptom severity. Currently, no transdiagnostic, multimodal predictive models of symptom  
7 severity that include neurobiological characteristics have been described. *Methods:* We built  
8 predictive models of three common symptoms in psychiatric disorders (dysregulated mood,  
9 anhedonia, and anxiety) from the Consortium for Neuropsychiatric Phenomics dataset (n=272)  
10 which contains clinical scale assessments, resting-state functional-MRI (rs-fMRI) and structural-  
11 MRI (sMRI) imaging measures from patients with schizophrenia, bipolar disorder, attention  
12 deficit and hyperactivity disorder, and healthy control subjects. We used an efficient, data-  
13 driven feature selection approach to identify the most predictive features from these high-  
14 dimensional data. *Results:* This approach optimized modeling and explained 65-90% of variance  
15 across the three symptom domains, compared to 22% without using the feature selection  
16 approach. The top performing multimodal models retained a high level of interpretability which  
17 enabled several clinical and scientific insights. First, to our surprise, structural features did not  
18 substantially contribute to the predictive strength of these models. Second, the Temperament and  
19 Character Inventory scale emerged as a highly important predictor of symptom variation across  
20 diagnoses. Third, predictive rs-fMRI connectivity features were widely distributed across many  
21 intrinsic resting-state networks (RSN). *Conclusions:* Combining rs-fMRI with select questions  
22 from clinical scales enabled high levels of prediction of symptom severity across diagnostically

1 distinct patient groups and revealed that connectivity measures beyond a few intrinsic RSNs may  
2 carry relevant information for symptom severity.

3

4 **Keywords:** Elastic Net, LASSO, Random Forest, Regression, CNS, Depression

5

6 **Introduction:**

7

8         The field of psychiatry has long relied on making diagnoses and recommending treatment  
9 for disorders based solely on clinical phenomenology, but this approach may hamper prognostic  
10 assessment, treatment, and drug development (1, 2). Biomarkers are biological characteristics  
11 that can serve as indicators for normal or pathogenic processes or intervention and exposure  
12 responses (3). Thus, they enable prediction of these assessments and outcomes and can therefore  
13 be an important clinical tool for clinicians. But biomarker development within psychiatry lags  
14 behind other areas of medicine. One reason for this may be that the field is still exploring  
15 biological measures able to robustly describe a complex psychiatric space. Another reason may  
16 be that a diagnostic biomarker approach does not fully account for the heterogeneity of  
17 symptoms under the umbrella of a single diagnosis or the shared symptoms between multiple  
18 diagnoses. This is because clinical symptoms such as depressed/elevated mood, anhedonia, and  
19 anxiety span multiple diagnostic categories (4) but vary between patients, show differential  
20 responses to treatments, and follow different prognostic trajectories. As suggested by the  
21 Research Domain Criteria (RDoC) approach (5, 6), supplementing the current clinical approach  
22 with a biologically-grounded approach that addresses transdiagnostic symptom variation may  
23 provide an avenue for creating more robust biomarkers in psychiatry.

1 Evidence is emerging that biological measures, specifically neuroimaging measures such  
2 as electroencephalogram (EEG) and functional magnetic resonance imaging (fMRI), are  
3 associated with symptom dimensions that span multiple psychiatric disorders or diverse  
4 community samples. Several studies have suggested that derived symptom dimensions are  
5 associated with changes in EEG power or resting-state fMRI (rs-fMRI) connectivity  
6 transdiagnostically (i.e., where multiple diagnostically-distinct patient groups are modeled  
7 together) (7–9). Others have found links between task-based fMRI activation or rs-fMRI  
8 connectivity and existing anhedonic, depressive, and anxiety symptom dimensions  
9 transdiagnostically (10–13). While the symptom to neurophysiological links in these studies are  
10 compelling, most lack a predictive framework, and we are not aware of any attempts toward  
11 creating transdiagnostic predictive symptom models integrating whole-brain, circuit-based  
12 functional neuroimaging with other data modalities. Combining biological and clinical variables  
13 has led to improved predictability in cancer models (14–16) but is underexplored in psychiatry.  
14 The predictive framework is especially powerful beyond associative frameworks (such as  
15 correlation analyses) as it not only allows multivariate modeling to deal with the high-  
16 dimensional, multimodal data but also testing of predictive value and generalizability of those  
17 models on a reserved subset or new samples (17–20). Such transdiagnostic, multimodal  
18 predictive models, optimized for performance, could eventually be used practically as clinical  
19 tools without constraining clinicians by diagnosis.

20 It is not clear if symptoms have a more circumscribed biological basis to a single or a  
21 select few brain networks as proposed in a recent taxonomy (21, 22) or a basis in multiple  
22 networks (e.g., (10)), so a whole-brain fMRI connectivity approach could help assess this  
23 outstanding question. In particular, we were motivated to test this simultaneously for multiple

1 symptoms to also assess the potential of a short rs-fMRI scan to act as a test for a multi-symptom  
2 panel (akin to a blood test). It is also not known if a single, broad self-report clinical assessment  
3 (like the Temperament and Character Inventory or the Hopkins Symptom Checklist) or multiple,  
4 more specific instruments are better at assessing multiple symptoms. A publicly-available  
5 dataset, the Consortium for Neuropsychiatric Phenomics (CNP; (23)) has included 3 patient  
6 groups with shared genetic risk (24) and MRI and clinical scale data with which we can assess  
7 these questions, so here we used it to explore 3 symptom dimensions – dysregulated mood,  
8 anhedonia, and anxiety. But the multimodal, high-dimensional variable space of both MRI and  
9 clinical scale data presents both methodological and interpretation challenges in building  
10 predictive symptom severity models. Thus, we apply a commonly-used data-driven feature  
11 selection approach from the field of machine learning to search through a high-dimensional  
12 space and optimize model performance and interpretability. We take an importance-weighted,  
13 forward selection approach (a variation of forward-stepwise selection, see (25)) as a data-driven  
14 way to identify the optimal feature subset to include in regression model-building (see (26, 27)  
15 for similar forward selection subset approaches to fMRI-based modeling). Finding an optimal  
16 subset helps in high-dimensional cases where the number of features (usually denoted by  $p$ ) is  
17 greater than the number of samples (usually denoted by  $n$ ) to avoid overfitting of the models. It  
18 also reduces nuisances from uninformative input variables without requiring the modeler to  
19 decide *a priori* whether a variable is signal or noise.

20 Thus, our main objective in this study was to use a fully data-driven method to find  
21 highly-predictive, transdiagnostic multimodal symptom severity models for several measures of  
22 dysregulated mood, anhedonia, and anxiety. Critically, demonstration of a set of highly-  
23 predictive models for multiple symptoms from a few broader tests (rs-fMRI, sMRI, scales)

1 would suggest a more feasible application of these tests to the clinic than multiple narrower tests  
2 (like task-based fMRI). As our approach leads to interpretable features (e.g., the top predictive  
3 scale items or rs-fMRI node-to-node connections are known), a secondary objective was to better  
4 understand the features returned by the best biomarkers at a category level (scales or intrinsic  
5 networks) and compare these to previously proposed hypotheses about associated behavioral and  
6 physiological components underlying symptoms. With our multimodal approach, we were also  
7 able to evaluate the relative contributions of multiple feature types in the context of multimodal  
8 models.

9  
10

## 11 **Methods and Materials:**

12  
13 *Participants*

14

15 Full details on the participants from the publicly-available CNP dataset are available  
16 including the consenting and human protections information in the data descriptor publication  
17 (23). Briefly, four groups of subjects were included in the sample which was drawn from adults  
18 aged 21-50 years: healthy controls (HC, n=130), Schizophrenia patients (SZ, n=50), Bipolar  
19 Disorder patient (BD, n=49), and Attention Deficit and Hyperactivity Disorder (ADHD, n=43).  
20 Stable medications were permitted for participants. Diagnoses were based on the Structured  
21 Clinical Interview for DSM-IV (SCID) and supplemented with the Adult ADHD Interview. Out  
22 of all subjects, one had incomplete clinical phenotype data from the clinical scales used in this  
23 study, 10 had missing sMRI data, and 10 had missing rs-fMRI data. Fifty-five subjects had a

1 headphone artifact in their sMRI data, whereas 22 subjects had errors in the structural-functional  
2 alignment step during MRI preprocessing. These subjects were excluded from the corresponding  
3 modeling analyses performed in this study. The participant numbers and demographics  
4 information are given in Table 1.

5

#### 6 *CNP Dataset*

7

8         The CNP dataset (release 1.0.5) was retrieved from the OpenNeuro platform  
9 (<https://openneuro.org/datasets/ds000030/versions/00001>). Of the extensive behavioral testing  
10 that participants underwent, we analyzed results from tests of their self-reported symptoms and  
11 traits as clinician-administered instruments were only given to subsets of participants. The self-  
12 reported tests used in our analysis include the Chapman social anhedonia scale (denoted  
13 *Chapsoc*), Chapman physical anhedonia scale (*Chapphy*), Chapman perceptual aberrations scale  
14 (*Chapper*), Chapman hypomanic personality scale, Hopkins symptom checklist (*Hopkins*),  
15 temperament and character inventory (*TCI*), adult ADHD self-report scale v1.1 screener (*ASRS*),  
16 Barratt impulsiveness scale (*Barratt*), Dickman functional and dysfunctional impulsivity scale  
17 (*Dickman*), multidimensional personality questionnaire – control subscale (*MPQ*), Eysenck’s  
18 impulsivity inventory (*Eysenck*), scale for traits that increase risk for bipolar II disorder  
19 (*Bipolar\_ii*), and Golden and Meehl’s Seven MMPI items selected by taxonomic method  
20 (*Golden*).

21         All participants used in this sample also underwent magnetic resonance imaging sessions  
22 with T1 scans (structural MRI) and T2\* scans of blood-oxygen-level-dependent (BOLD) resting-  
23 state functional-MRI and several tasks. Here we only utilize the sMRI and rs-fMRI data (304

1 seconds in length), and full details of these MRI acquisitions can be found in Poldrack et al. (23).  
2 Our decision to focus on rs-fMRI data over task-based fMRI was also due to its ability to provide  
3 a fine-grained, data-driven set of functional connectivity features that exhibit meaningful  
4 individual differences (28) that relate to symptoms (e.g., (8, 10, 29)).

## 5 6 *Preprocessing Data into Features*

7  
8 We chose to use all responses to individual questions from the 13 self-report scales as  
9 input features for a total of 578 questions. Subjects who had missing values for any scales used  
10 in a particular model were not included in that model. Outcome variables for modeling mood,  
11 anhedonia, and anxiety were also selected from the clinical scales.

12 Preprocessing of sMRI was performed using the *recon-all* processing pipeline from the  
13 Freesurfer software package (30). Briefly, the T1-weighted structural image from each subject  
14 was intensity normalized and skull-stripped. The subcortical structures, white matter, and  
15 ventricles were segmented and labeled according to the algorithm described in (30). The pial and  
16 white matter surfaces were then extracted and tessellated (31), and cortical parcellation was  
17 obtained on the surfaces according to a gyral-based anatomical atlas which partitions each  
18 hemisphere into 34 regions (32). The structural features from bilateral *aparc.stats* and *aseg.stats*  
19 files were extracted via the *aparcstats2table* and *asegstats2table* functions in Freesurfer.

20 Preprocessing of rs-fMRI was performed using the AFNI software package (33).  
21 Preprocessing of each subject's echo planar image (EPI) data included several steps: removal of  
22 the first 3 volumes (before the scanner reached equilibrium magnetization), de-spiking,



1 registration of all volumes to the now first volume, spatial smoothing with a 6 mm full-width  
2 half-maximum Gaussian filter, and normalization of all EPI volumes by the mean signal to  
3 represent data as percent signal change. Anatomical data also underwent several steps:  
4 deobliquing of the T1 data, uniformization of the T1 to remove shading artifacts, skull-stripping  
5 of the T1, spatial alignment of the T1 and Freesurfer-segmented and -parceled anatomy to the  
6 first volume of the EPI data, and resampling of the Freesurfer anatomy to the resolution of the  
7 EPI data. Subsequently, we used the ANATICOR procedure (34) for nuisance tissue regression.  
8 White matter and ventricle masks were created and used to extract the BOLD signals (before  
9 spatially-smoothing the BOLD signal). A 25mm-radius sphere at each voxel of the white matter  
10 mask was used to get averaged local white matter signal estimates while the average ventricle  
11 signal was calculated from the whole ventricle mask. Time series for the motion estimates, and  
12 the BOLD signals in the ventricles and white matter were detrended with a 4<sup>th</sup> order polynomial.  
13 To clean the BOLD signal, we regressed out the nuisance tissue regressors and the six motion  
14 estimate parameters. Cleaned data residuals were used for all subsequent analysis. Both the  
15 preprocessed T1 scan and the cleaned residuals of the EPI scan were warped to MNI space and  
16 resampled to 2mm isotropic voxels. The time series of the cleaned residual data was extracted  
17 from each of 264 regions of interest (ROIs) as delineated by the Power atlas (35). At each ROI,  
18 the signals from the voxels within a 5mm radius sphere were averaged. Pearson's correlations  
19 were then calculated between the averaged time series from all ROIs yielding 34716 unique  
20 edges in the functional connectivity graph (upper triangle of the full correlation matrix). Quality  
21 control (QC) for MRI preprocessing was performed individually on the whole dataset by two  
22 authors (MM, YL) who had 85% and 89% agreement between them regarding rejection  
23 decisions for each participant's sMRI and rs-fMRI data, respectively. Specifically, subjects were

1 excluded if they had mis-registration between fMRI and sMRI scans, >3mm head motion in the  
2 fMRI scan, headphone artifacts that overlapped with brain tissue in the sMRI scan, incorrect  
3 segmentation in the sMRI scan, and aliasing or field of view artifacts in either scan.  
4 Discrepancies were resolved between the two authors in order to create a final rejection list of  
5 participants.

6 Input features for each subject came from the three preprocessed datasets: raw scores on  
7 the 578 individual items of 13 self-report clinical scales, 270 Freesurfer-calculated structural  
8 measurements (including subcortical volume, cortical volume, cortical area, cortical thickness),  
9 and 34716 AFNI-calculated functional connectivity scores between individual ROIs. Subsets of  
10 these input features were used as predictor variables in subsequent modeling as explained below.

11 Output variables that were modeled included those which indexed mood, anhedonia, and  
12 anxiety. We predicted a mix of total scores and sub-scale sum or average scores from scales that  
13 were given to all three patient groups and HCs to retain the largest number of subjects possible in  
14 our models. Each of these scores were already calculated and included in the CNP dataset, and  
15 we chose to use them rather than determining our own grouping of individual scores as we did  
16 not always have access to original scale questions. For mood, we used the average of depression  
17 symptom questions 5, 15, 19, 20, 22, 26, 29, 30, 31, 32, and 54 from the Hopkins inventory  
18 (precalculated “Hopkins\_depression” score, further referenced as *Mood/Dep\_Hopkins* in this  
19 study) and the sum of mood questions 1-9 from the Bipolar\_ii inventory (precalculated  
20 “Bipolar\_mood” score, further referenced as *Mood\_Bipolar* in this study). Anhedonia was  
21 derived from total scores on the Chapman Social Anhedonia scale (precalculated “Chapsoc”  
22 score, further referenced as *Anhedonia\_Chapsoc* in this study) and the Chapman Physical

1 Anhedonia scale (precalculated “Chapphy” score, further referenced as *Anhedonia\_Chapphy* in  
2 this study). Anxiety was indexed from the sum of Bipolar\_ii anxiety questions 24-31  
3 (precalculated “Bipolar\_anxiety” score, further referenced as *Anxiety\_Bipolar* in this study) and  
4 average of anxiety symptom questions 2, 17, 23, 33, 39, and 50 from the Hopkins anxiety score  
5 (precalculated “Hopkins\_anxiety” score, further referenced as *Anxiety\_Hopkins* in this study).  
6 Subjects with missing values (“n/a”) for any input or output variables or who did not pass MRI  
7 QC were removed from the input set. As different input feature sets were used, different models  
8 had different sample sizes. See the samples sizes resulting from this factor in Supplementary  
9 Table S1.

10

### 11 *Regression Modeling*

12

13 All regression modeling was performed with a combination of Python language code and  
14 the Python language toolbox scikit-learn (<http://scikit-learn.org/stable/index.html>). We modeled  
15 six different symptom severity scores across the clinical scales. For each of the six models, we  
16 used seven combinations of feature types as the inputs to be able to evaluate performance of  
17 single and multimodal feature sets. These included clinical scales only, sMRI only, fMRI only,  
18 scales+sMRI, scales+fMRI, sMRI+fMRI, and scales+sMRI+fMRI. As input features varied in  
19 their mean values and regularized models require normally-distributed data, we scaled each input  
20 feature separately to have zero mean and unit variance. We also wanted to explore performance  
21 with a variety of modeling algorithms, so for each scale output and feature set input, we used two  
22 regularized general linear model regression algorithms – LASSO and Elastic Net – and one non-  
23 linear regression model algorithm – Random Forest – for the modeling. These methods have

1 been found to improve prediction accuracy and interpretability over regular regression methods  
2 using ordinary least squares. LASSO (36) was the first to use regularization by imposing an L<sub>1</sub>-  
3 penalty parameter to force some coefficients to zero; this step introduces model parsimony that  
4 benefits interpretability and predictive performance while guarding against overfitting. If  
5 predictor variables are correlated, however, the LASSO approach will arbitrarily force only a  
6 subset of them to zero which makes interpretation of specific features more difficult. The Elastic  
7 Net algorithm (37) uses both L<sub>1</sub>- and L<sub>2</sub>-penalty parameters to better be able to retain groups of  
8 correlated predictor variables; this improves interpretability as highly predictive features will not  
9 randomly be set to zero thereby diminishing their importance to the model. It is also better  
10 suited in cases when the number of predictor variables is much greater than the number of  
11 samples ( $p \gg n$ ). The non-linear regression algorithm Random Forest was also chosen (38) for  
12 comparison purposes.

13 We built 126 (6 outcome variables x 7 predictor variable sets x 3 model algorithms) sets  
14 of models (Figure 1a). For each of these sets of models, hyperparameters were tuned using 5-  
15 fold cross-validated grid-search on a training set of data (80% of data), and selected  
16 hyperparameters were used on a separate evaluation set of data (20% held-out sample). The  
17 approaches of cross-validation and of splitting data between training and evaluation data is one  
18 way to minimize overfitting in addition with permutation testing which we also performed below  
19 (18, 39). The hyperparameter range for LASSO was alpha equal to 0.01, 0.03, and 0.1 (three  
20 samples through the log space between 0.01 and 0.1) which is the coefficient of the L<sub>1</sub> term.  
21 Hyperparameter ranges for Elastic Net were alpha equal to 0.01, 0.03, and 0.1, and l1\_ratio equal  
22 to 0.1, 0.5, and 0.9 which is the mixing parameter used to calculate both L<sub>1</sub> and L<sub>2</sub> terms.  
23 Hyperparameter ranges for Random Forest included the number of estimators equal to 10 or 100

1 and the minimum samples at a leaf equal to 1, 5, and 10. The best hyperparameters were chosen  
2 from the model that maximized the  $r^2$  score (coefficient of determination) across the 5-fold cross-  
3 validation procedure in the training set and applied to the model of the never-seen evaluation set.

4 For each of the 126 sets of models, we took an importance-weighted, forward selection  
5 approach to regression modeling, involving three main steps: first, an initial rank-ordering step  
6 for ordering features by importance; second, a forward-selection search step for building a series  
7 of models utilizing growing subsets of ordered features (i.e., the best features) selected from the  
8 first step; and third, an evaluation step to choose the best model and subset of features according  
9 to a prespecified criterion to find the optimal model (Figure 1b, c, d). This approach thus  
10 integrates feature selection into modeling using a multivariate embedded method that can take  
11 variable interactions into account to potentially construct more accurate models (40). Within  
12 each step, each new model utilized the training/evaluation set split and grid-search procedure to  
13 optimize hyperparameters as explained above. First, the feature rank-ordering step uses the full  
14 feature set (either scale only, sMRI only, etc.) as the input to the model algorithms which returns  
15 not only predicted values for the evaluation dataset but also the importance of each feature for  
16 the resulting model (Figure 1b). Feature importance was assessed from the regression  
17 coefficients with ordering (most important to least important) based on the absolute value of the  
18 coefficient. Ordering by absolute value reflects that features with the largest magnitude  
19 influence the symptom severity scores the most. Feature ordering was performed separately for  
20 LASSO and Elastic Net models, but as feature importance is harder to assess for the Random  
21 Forest algorithm (typical regression coefficients are not available), we used the ordering from the  
22 Elastic Net models as input for the subsequent steps of Random Forest modeling instead.

1           Second, the forward-selection search step systematically searches through subsets of the  
2 rank-ordered features (truncated feature sets) for the subset that leads to the best model (Figure  
3 1c). Since having more features than samples (i.e.,  $p \gg n$ ) both increases the risk of overfitting  
4 and decreases the performance due to uninformative features adding nuisances, we chose this  
5 data-driven way of searching the ordered feature space for an optimal subset of features. We ran  
6 a series of regressions on subsets of the ordered features with subsets chosen in powers of 2 (i.e.,  
7 inputting the top feature only, the top 2 features only, the top 4 features only, etc.) up to  $2^{15}$   
8 features. In order to generate descriptive statistics for this step, we used 25 iterations of  
9 modeling for each feature subset to get median and standard deviation metric scores. The  
10 metrics chosen for the final step of evaluation were mean squared error (MSE) and  $r^2$ . The  
11 median  $r^2$  and standard deviation of  $r^2$  were found for each subset. And the “best model” overall  
12 was selected by finding the maximum median  $r^2$  value over all feature subsets and selecting the  
13 model that corresponded to that max median  $r^2$  value (Figure 1d). All subsequent follow up is on  
14 the 126 best models for each combination of input x model type x output.

15           To find which input feature set (clinical scales only, sMRI only, fMRI only,  
16 scales+sMRI, scales+fMRI, sMRI+fMRI, and scales+sMRI+fMRI) and which model type  
17 (LASSO, Elastic Net, Random Forest) lead to the best biomarkers, subsequent comparisons were  
18 also made based on the  $r^2$  of the best models. The  $r^2$  is a standardized measurement of explained  
19 variance (with a maximum value of 1 but an unbounded minimum) while the MSE values are not  
20 standardized across the different models making it less appropriate to use MSE for comparison.

21           To test alternative hypotheses that modeling may have been impacted by overfitting or  
22 variables of no interest, we implemented several control scenarios. We compared model  
23 performance for the best models (chosen by the methods above) with models with permuted

1 outcome variables (to test for overfitting) and models that included variables of no interest. In  
2 the first case, the null hypothesis is that the features and severity scores are independent;  
3 however, an overfit model could misidentify dependence. But if the high performance of our  
4 models is due to identification of real structure in the data rather than overfitting, the best models  
5 will perform significantly better than models built from the permuted data and we can reject the  
6 null hypothesis (41). After the original ordering of features and selection of the 2<sup>n</sup> subset that led  
7 to the best model, we permuted severity scores across subjects for a given outcome variable 100  
8 times and built 100 models based on the permuted scores. We then calculated predictability  
9 (assessed with  $r^2$ ) from these 100 permuted models which allowed us to generate an empirically-  
10 derived distribution of  $r^2$  values for calculating a test statistic (p-value) compared to the median  
11  $r^2$  of the chosen best model. In the second control case, models built with only predictor  
12 variables of no interest allowed us to assess the predictability of these variables to see if possible  
13 confounding variables drive our results. These variables of no interest included age, gender,  
14 years of schooling, in-scanner mean framewise displacement which was calculated as an L2  
15 norm, and sharp head motion (output of AFNI's @1dDiffMag). Modeling was also performed  
16 100 times to generate the  $r^2$  score distribution and the median  $r^2$  was compared to this  
17 distribution.

18

19

## 20 **Results:**

21

22 *Selection of models to predict symptom severity*

23

1           Within a multimodal dataset, we attempted to find the best predictive models for  
2    symptom severity transdiagnostically comparing results across models for mood, anhedonia, and  
3    anxiety for different predictor variable feature sets and different machine learning algorithms.  
4    We found the best  $r^2$  metric was generally for the scales+sMRI+fMRI input set using Elastic Net  
5    across the different outcome variables (a full explanation of how we compared these models for  
6    mood, anhedonia and anxiety outcome scores are further explained in the Supplementary  
7    Materials). Thus, we have chosen to further examine the features returned for this set of models  
8    more closely. Also note that the modeling results for Elastic Net using the full feature sets (not  
9    the truncated sets returned by the forward modeling approach) on average explained 22% of the  
10   variance while truncated sets explained an average of 78% for the scales+sMRI+fMRI input  
11   models (metrics for full features sets are presented in Supplementary Table S10).

12           For the six models using Elastic Net with scales+sMRI+fMRI input feature set, we  
13   evaluated model performance on the held-out test (evaluation) set with measured v. predicted  
14   plots (Figure 2) and  $r^2$  values across models for different outcome variables (Figure 3 and  
15   Supplementary Table S9, last column). All 6 models were highly predictive with the variance  
16   explained ranging from 65-90%. Next, we compared the proportions of features derived from  
17   scale, fMRI, and sMRI feature sets for the best model for each outcome variable both among the  
18   whole feature set and the top 25% of features (Figure 4a,b). The best models for  
19   *Mood/Dep\_Hopkins*, *Anhedonia\_Chapphy*, and *Anxiety\_Bipolar* had a roughly equal number of  
20   scale and fMRI features while *Anxiety\_Hopkins*, *Anhedonia\_Chapsoc*, and *Mood\_Bipolar*  
21   models had a bias towards fMRI features (Figure 4a). Figure 4b demonstrates though that for  
22   many outcome variables there is a disproportionate number of scale features in the top features.  
23   There is a paucity of sMRI features in both the these models as only *Anhedonia\_Chapphy* had



1 any sMRI features selected by the models. Because of this lack of sMRI features overall, we do  
2 not further examine this modality.

3

#### 4 *Clinical features associated with symptom severity*

5

6 We can further examine groupings of the scale-based features sorted by proportion of the  
7 scales from which they are derived. For each model, the scale features for the best model are  
8 proportionately selected from the scales shown in Figure 5. The TCI scale in particular is highly-  
9 represented compared to the other scales in all six models (note that Hopkins, Bipolar, Chapphy,  
10 and Chapsoc items could not be included in all models as we excluded them when predicting  
11 their own sub- or total score). TCI contains a number of questions on temperament and character  
12 traits that could be related to a variety of symptoms, and our results suggested that it contains  
13 questions that are predictive of mood, anhedonia, and anxiety (Table 2). For example, 43% of  
14 the questions predictive of *Anxiety\_Bipolar* were from TCI, with the most predictive question  
15 being “I am not shy with strangers at all.” Positive responses to this question predicted a lower  
16 *Anxiety\_Bipolar* score since the regression coefficient was negative in this model. Though not  
17 uniformly so, some of the other questions also assessed shyness or worry. The  
18 *Anhedonia\_Chapsoc* model also had a very high percentage of TCI questions, with the most  
19 predictive question being “I would like to have warm and close friends with me most of the  
20 time.” Here positive responses indicated decreased social anhedonia severity as the regression  
21 coefficient was also negative. While not all questions in the TCI pertain to people and social  
22 situations, all but one of the remaining questions that were predictive of the *Anhedonia\_Chapsoc*  
23 score did include mention of these situations. The predictive questions for the

1 *Anhedonia\_Chapphy*, *Mood/Dep\_Hopkins*, *Mood\_Bipolar*, and *Anxiety\_Hopkins* scores were  
2 more mixed overall though. Full feature lists for the scale items can be requested from the  
3 authors. Additionally, Figure 5 shows that *Chaphyp* questions were also predictive in all models  
4 (but it only contributed 1-2 items in 5 of the 6 scales). The most numerous questions (6/31) from  
5 Chaphyp was for *Mood\_Bipolar* which may be expected as the Chapman hypomanic scale and  
6 the *Mood\_Bipolar* subscore of this scale both include an assessment of mania (as opposed to the  
7 *Mood/Dep\_Hopkins* score which is more related to depressed mood and depressive symptoms).

8

9 *Neurobiological characteristics of dysregulated mood, anhedonia and anxiety*

10

11 The fMRI connectivity features were composed of the strengths of network edges  
12 (connections between nodes) but can also be grouped by suggested intrinsic resting-state  
13 networks from the Power atlas. As the number of fMRI connectivity features selected by the  
14 models were a small subset of all possible fMRI connectivity features, full connectivity matrices  
15 are quite sparse (see Supplemental Figure S1). Therefore, we counted the number of edges  
16 within and between each intrinsic resting-state network (RSN) and show these counts in the  
17 connectivity matrices of Figure 6 (left figure of each panel) for each outcome variable. Please  
18 note that connectivity matrices have the same ROIs and networks listed on both axes, and the  
19 lower left triangle is redundant to the upper right triangle. The predictive fMRI connectivity  
20 features appear mostly distributed across multiple networks rather than selective to a few  
21 particular networks as also demonstrated in the color-coded nodes on the brain surfaces (Figure  
22 6, right figure in each panel – please note that cerebellar nodes are not plotted as we only show  
23 cortical brain surfaces). Connectivity features implicate nodes in 10 RSNs for

1 *Mood/Dep\_Hopkins*, 12 RSNs for *Mood\_Bipolar*, 10 RSNs for *Anhedonia\_Chapphy*, 12 RSNs  
2 for *Anhedonia\_Chapsoc*, 13 RSNs for *Anxiety\_Hopkins*, and 10 RSNs for *Anxiety\_Bipolar*  
3 models. Additionally, all 6 models contain features from nodes labeled as “Uncertain” from the  
4 Power atlas which indicated that Power et al. were uncertain about the RSN membership of these  
5 nodes. While *Anhedonia\_Chapsoc* connectivity was also distributed, there was a higher  
6 concentration of connectivity features between the Default Mode (DM) network and other  
7 networks. In particular, the predictive edges between the DM and other networks mostly  
8 originate from the anterior cingulate and/or the medial orbitofrontal lobe. The  
9 *Anhedonia\_Chapsoc* model also contained nodes in the top 5 features that were located within  
10 Williams’ (21) proposed reward circuit including putamen and OFC. Edges either within the  
11 DM network or between the DM and other networks consistently were the most numerous  
12 features relative to all other within- and between-network features across all models. All the  
13 features in each model, including sMRI, are available upon request from the authors.

14

#### 15 *Controls*

16

17 It is possible that any predictive models generated from the methods above are influenced  
18 by confounding demographic or other variables (age, gender, years of schooling, and two  
19 measures of in-scanner head motion). For each of the six outcome variables, we built Elastic  
20 Net models including these variables of no interest; since the number of predictor variables was  
21 only five, the feature selection step was not applied for determining these models though the  
22 grid-search, cross-validation, and training/evaluation set steps were applied. In comparison to  
23 the median  $r^2$  values from the best models using scales+sMRI+fMRI features, the predictability

1 of our best models was significantly greater than the variables of no interest models (all  $p < 0.01$ ).  
2 Additionally, another set of Elastic Net models with the Scales+sMRI+fMRI feature set but with  
3 scrambled severity scores (a permutation testing approach) were built and used to test for  
4 overfitting, but we found no evidence of overfitting using this approach as demonstrated by the  
5 empirical null distributions (see Supplementary Materials, Figure S2). For all 6 models, the  
6 median  $r^2$  of the best models was statistically significant ( $p < 0.01$ ).

7 As the models with the least complexity are scales-only models and may be of interest to  
8 some readers, we additionally include results for this set of models in the Supplementary  
9 Materials section (Supplementary Figure S3 and see Table S9 for metrics of scales-only models  
10 built with Elastic Net).

11

12

### 13 **Discussion:**

14

15 In this study, we explored models for predicting symptom severity of mood disturbances,  
16 anhedonia, and anxiety in a transdiagnostic sample. We applied an importance-ranked, forward  
17 selection modeling approach to search for the most predictive input features from a set of clinical  
18 scale measures, sMRI measures, and rs-fMRI measures. Notably, this data-driven way of  
19 selecting feature subsets led to multimodal neurobehavioral models with consistently high  
20 predictability across multiple symptom domains and also led to high interpretability since it  
21 retains importance scores for individual features. Thus, we demonstrate that the shorter, broadly-  
22 applicable 5-minute rs-fMRI scan and a small set of clinical scale assessments can potentially be  
23 used to predict a panel of core symptoms commonly found in various psychiatric disorders.

1 Overall, Elastic Net regression models with all three input feature types explained the most  
2 variance but features from the different modalities were not equally represented in the models  
3 when evaluating the magnitude of the coefficients. The individual, edge-level fMRI connectivity  
4 measures between specific network nodes dominated in nearly all of the regression models for  
5 different symptom measures, but responses to individual questions in self-report clinical scales  
6 were also highly predictive. sMRI measures were not well-represented among the essential  
7 features in our models.

8 As the main objective in this study was to maximize predictability (we chose variance  
9 explained as the metric) for models whose regression coefficients could be used for  
10 interpretation, we have features that can be assessed for clinical and scientific insights. It must  
11 be kept in mind, however, that the features of the best models were chosen in the context of other  
12 types of features and are perhaps not as comprehensive as models examining single modalities  
13 (i.e., the number of features,  $p$ , for scale items differs in scales-only models compared to  
14 multimodal models). Additionally, the forward selection approach finds that different  $p$ 's  
15 optimize  $r^2$  in different models which also restricts comparison across models of similar and  
16 different symptom domains. Still, there are potentially useful insights that can be extracted at a  
17 high level about each of the feature types and symptom domains.

18

19 *Contributions of scale assessments and fMRI connectivity to models*

20

21 The relative contributions of the different feature types suggest that both scale items and  
22 fMRI connectivity were highly important to model predictability. While scale features were not  
23 as greatly represented in the best models' feature list as fMRI features overall, they tended to be

1 more highly represented in the top 25% of features. Thus, their relative importance may be  
2 higher than fMRI features, though clearly the multimodal models performed better than scales-  
3 only models suggesting that both scale and fMRI components contain unique information. Such  
4 a comparison of different feature types in transdiagnostic or community-based symptom severity  
5 biomarker studies is not as common (but see for example (42) for a comparison of plasma sterols  
6 and demographic variables for prediction of depression severity). It is a valuable step, however,  
7 when multiple data types are available for creating predictive models as each data type has  
8 benefits and drawbacks in ease of collection, measurement stability, resources required for  
9 processing, etc. which may impact choice of data collected for future studies. With regard to the  
10 largely negative results for sMRI features, a recent review finds that sMRI regularly  
11 underperforms at Major Depressive Disorder (MDD) diagnostic classification in comparison to  
12 fMRI (43). Others have also suggested that the lack of studies reporting sMRI abnormalities in  
13 SZ, BD, and ADHD has been suggested to reflect the lack of predictability or need for larger  
14 sample sizes in detecting effects in this modality (44, 45). It is possible that the sample size in  
15 the CNP dataset was not sufficient to maximize the utility of sMRI for prediction.

16 We further investigated the categorical origins of the fMRI features and clinical scale  
17 features for these models. Assessing the categorical groupings of importance-ranked fMRI  
18 connectivity features for each model was done according to intrinsic resting-state networks of the  
19 Power atlas which partially overlap with a recently proposed taxonomy of symptom-related  
20 networks suggested by Williams (21, 22). In contrast with that proposal for a more focused set  
21 of brain regions within specific networks as showing impairment that underlie symptoms, this  
22 analysis demonstrated that overall these highly-predictive features are distributed across  
23 elements of many networks (note that in some models, the edge between two nodes of different

1 intrinsic RSN memberships may be the only element involving those networks) in line with other  
2 findings for cross-system representations (46). This may have the implication that it is useful for  
3 examining whole-brain connectivity between individual nodes when creating models instead of  
4 relying solely upon summary metrics of networks such as graph theory metrics, independent  
5 components, or more circumscribed ROI approaches to connectivity (see (10, 47) for a similar  
6 full ‘connectome’ approach). Specifically, anhedonia models found not only elements of the  
7 reward circuit that Williams (21, 22) proposed as linked to this symptom but also multiple nodes  
8 in the DM, Salience (SAL), Cingulo-Opercular Task Control (COTC), Fronto-Parietal Task  
9 Control (FPTC), and Visual (VIS) networks among others. Connectivity changes tied to  
10 rewarding contexts in this wider set of networks have been observed by others (10, 48) while a  
11 meta-analysis of task-based reward processing in MDD demonstrated dysfunctional activation in  
12 a broad set of regions including frontal, striatal, cerebellar, visual, and inferior temporal cortex  
13 (49). As nodes within the DM network are activated both during self-referential processing and  
14 social and emotional processing (29, 50, 51), symptoms that decrease socially pleasurable  
15 experiences could have bases in this network. And coordination between several of these  
16 networks are necessary for healthy function, but patients with disruptions to the salience network  
17 may have trouble switching between DM and executive control networks which may underlie  
18 rumination (52) or impaired reward processing (48). Indeed subcortical nodes of the salience  
19 network (not included in our analysis) are located in mesocorticolimbic emotional and reward  
20 processing centers of the brain (53), so disruption of these functions may propagate to cortical  
21 salience regions and beyond.

22         Our anxiety models also had informative features across a widespread set of networks  
23 including high representation in the DM network and sparser representation across executive

1 networks (FPTC, COTC, Dorsal Attention (DA)), SAL network, and sensory networks. Though  
2 Williams (21, 22) linked anxiety to a set of networks including a threat circuit, the SAL, DM,  
3 and Attention networks, our findings seem to point to a broader set that have some support from  
4 previous studies. For example, anxiety has been found related to dysfunction in the DM, SAL,  
5 and Somatomotor networks (54), the FPTC network (55), in addition to COTC and Visual  
6 Attention (VA) networks (56). Given the core processes of these networks, the underlying  
7 elements of anxiety – trouble regulating emotion in fearful situations, detecting and controlling  
8 conflict, increased attention to emotional stimuli – have reasonable relationships to this set of  
9 networks.

10 Our depression and mood models predicted outcome variables that were perhaps not as  
11 narrowly-focused on a single symptom. The *Mood/Dep\_Hopkins* subscore contained depressed  
12 mood questions but also ones about guilt, suicide, loss of interest, and somatic concerns, while  
13 *Mood\_Bipolar* contained questions about both depressed and manic moods, states which the  
14 brain may reflect differently (57). We found that both models also relied on a broad set of  
15 networks beyond the negative affective circuit (ACC, mPFC, insula, and amygdala) proposed by  
16 Williams (21, 22). Both anterior and posterior nodes of the DM network were informative to the  
17 model as well as FPTC, COTC, Attention, SAL, and Sensory networks. Cognitive Control  
18 networks, Salience, and Attention, and Affective networks have been proposed to be involved in  
19 depressed mood (58, 59) while a central node, the subgenual cingulate, is involved in mood (60,  
20 61) and connected within the DM network (62) and approximately observed in our findings.  
21 Spielberg and colleagues (63) recently examined connectivity during both depressed and  
22 elevated mood in BD and found increased amygdala-sensory connectivity and abnormal  
23 prefrontal-parietal connectivity during manic states and extensive orbito-frontal to subcortical



1 and cortical connectivity in depressed states, while Martino and colleagues (64) found the ratio  
2 of DM to sensory-motor network activity was greater in a depressed state of BD and less in  
3 manic states in BD. Thus a wide set of regions and networks may be involved in depressed and  
4 elevated mood, but there may be some dissociation between the two with more DM in depressed  
5 mood and sensory involvement in elevated mood. The *Mood\_Bipolar* outcome variable included  
6 both, so this model includes multiple nodes from both sets of RSNs as important features.

7         The categorical origins of the clinical scale features demonstrated that there was also  
8 some similarity in the scales from which models for the six outcome variables were drawn as  
9 most included items from the TCI, Hopkins Symptom Checklist, and the Chapman scales. The  
10 TCI in particular was consistently one of the most predictive scales as assessed by number of  
11 questions contributed for all six models of mood, anhedonia, and anxiety. This scale measures  
12 temperaments such as harm avoidance and novelty seeking (65) which have previously been  
13 associated with depression (e.g., (66) and anxiety (67)). Our results suggest that it also contains  
14 items predictive of anhedonia. In particular, our models picked out questions from TCI that  
15 pertained to social situations as predictive of the social anhedonia severity, but the  
16 correspondence between physical anhedonia and the predictive TCI questions was less clear.  
17 The consistent representation of TCI across the six measures of three symptoms might suggest  
18 that it could be a useful self-report questionnaire to include when screening patients for multiple  
19 symptom domains.

20

21 *Limitations*

22

1           Our study has some limitations. Outside of a training and evaluation split of the data, we  
2 were not able to perform additional validation of the models' predictive ability on an external  
3 dataset. This would be difficult since the CNP dataset has extensive behavioral phenotyping  
4 with clinical scales which few datasets could replicate unless collected prospectively. As we  
5 used many of these scales in our models, a thorough validation of the best models would require  
6 a dataset which has the same scales. Also, as our models are linear, they only model and select  
7 as informative the features which trend in the same direction for all subjects. For example, it has  
8 been noted by Whitton et al. (68) that the direction of reward-related activity in the ventral  
9 striatum can differ between patient groups that both have anhedonia (i.e., lower in MDD and  
10 higher in BD compared to HC). Linear models would not be able to pick out this feature. Thus,  
11 these modeling choices constrain our interpretations, and the features that our models return  
12 should not be seen as a completely comprehensive list of all informative features for predicting  
13 symptom severity or as the only ones potentially involved in the underlying biological processes.

14

## 15 *Conclusions*

16

17           While we have developed models that identify potential biomarkers for  
18 depressed/elevated mood, anhedonia, and anxiety, our work is still highly exploratory. Robust  
19 biomarkers must undergo several stages of development requiring replication across differing  
20 conditions (e.g., MRI scanners and sites) and increasing sample sizes of datasets to achieve  
21 population-level utility (69). This study was able to demonstrate one possible data-driven way to  
22 improve biomarker development for predicting symptom severity transdiagnostically and  
23 potentially moves us closer to a personalized medicine approach in diagnosing and treating

1 behavioral disorders. Taking a transdiagnostic symptom-based approach may ultimately provide  
2 more options for predicting longitudinal and treatment outcomes beyond those afforded by  
3 diagnosis alone. Such an approach can possibly loosen the constraints of diagnoses by allowing  
4 clinicians to estimate symptom severity in broader populations without a diagnosis. Still, the  
5 RDoC framework suggests that “the critical test is how well the new molecular and  
6 neurobiological parameters predict prognosis or treatment response” (6), and while the high  
7 performance of our symptom severity biomarkers is a step towards creating highly-predictive  
8 models for potentially unknown symptom measures, a critical next step would be to create  
9 longitudinal ones that predict future measures.

10

11

## 12 **Acknowledgments:**

13 This work was supported by BlackThorn Therapeutics and has been placed on the preprint server  
14 BioRxiv. The authors would like to thank Ariana Anderson for early discussions and Clark Gao,  
15 Annette Madrid, Atul Mahableshwarkar, Lori Jean Van Orden, Simone Krupka, and Alan  
16 Anticevic for discussions and comments on earlier drafts of the manuscript.

17

## 18 **Disclosures:**

19 The authors are employees of BlackThorn Therapeutics and therefore compensated financially  
20 by BlackThorn Therapeutics.

21

22

## 23 **References:**

1  
2  
3  
4  
5  
6  
7  
8  
9  
10  
11  
12  
13  
14  
15  
16  
17  
18  
19  
20  
21  
22  
23

1. Joyce DW, Kehagia AA, Tracy DK, Proctor J, Shergill SS (2017): Realising stratified psychiatry using multidimensional signatures and trajectories. *J Transl Med.* 15: 15.
2. Insel TR, Cuthbert BN (2015): Brain disorders? Precisely. *Science.* 348: 499–500.
3. (2018, May 2): BEST (Biomarkers, EndpointS, and other Tools) Resource - NCBI Bookshelf. Retrieved from <https://www.ncbi.nlm.nih.gov/books/NBK326791/>.
4. Kring AM (2008): Emotion disturbances as transdiagnostic processes in psychopathology. *Handbook of emotion.* 3.
5. Abi-Dargham A, Horga G (2016): The search for imaging biomarkers in psychiatric disorders. *Nature Medicine.* 22: 1248–1255.
6. Insel T, Cuthbert B, Garvey M, Heinssen R, Pine DS, Quinn K, *et al.* (2010): Research Domain Criteria (RDoC): Toward a New Classification Framework for Research on Mental Disorders. *Am J Psychiat.* 167: 748–751.
7. Grisanzio KA, Goldstein-Piekarski AN, Wang M, Ahmed AP, Samara Z, Williams LM (2017): Transdiagnostic Symptom Clusters and Associations With Brain, Behavior, and Daily

- 1 Function in Mood, Anxiety, and Trauma Disorders. *Jama Psychiatry*. . doi:  
2 10.1001/jamapsychiatry.2017.3951 .  
3  
4 8. Xia C, Ma Z, Ciric R, Gu S, Betzel RF, Kaczkurkin AN, *et al.* (2018): Linked dimensions of  
5 psychopathology and connectivity in functional brain networks. *Nat Commun*. 9: 3003.  
6  
7 9. Elliott ML, Romer A, Knodt AR, Hariri AR (2018): A Connectome Wide Functional  
8 Signature of Transdiagnostic Risk for Mental Illness. *Biol Psychiat*. . doi:  
9 10.1016/j.biopsych.2018.03.012 .  
10  
11 10. Sharma A, Wolf DH, Ciric R, Kable JW, Moore TM, Vandekar SN, *et al.* (2017): Common  
12 Dimensional Reward Deficits Across Mood and Psychotic Disorders: A Connectome-Wide  
13 Association Study. *Am J Psychiat*. 174: 657–666.  
14  
15 11. Hägele C, Schlagenhaut F, Rapp M, Sterzer P, Beck A, BERPohl F, *et al.* (2015):  
16 Dimensional psychiatry: reward dysfunction and depressive mood across psychiatric disorders.  
17 *Psychopharmacology*. 232: 331–341.  
18  
19 12. Satterthwaite T, Cook P, Bruce S, Conway C, Mikkelsen E, Satchell E, *et al.* (2015):  
20 Dimensional depression severity in women with major depression and post-traumatic stress  
21 disorder correlates with fronto-amygdalar hypoconnectivity. *Mol Psychiatr*. 21: 894–902.  
22  
23 13. Yang Z, Gu S, Honnorat N, Linn KA, Shinohara RT, Aselcioglu I, *et al.* (2018): Network

- 1 changes associated with transdiagnostic depressive symptom improvement following cognitive  
2 behavioral therapy in MDD and PTSD. *Mol Psychiatr.* 1–10.
- 3
- 4 14. Pittman J, Huang E, Dressman H, Horng C-F, Cheng SH, Tsou M-H, *et al.* (2004): Integrated  
5 modeling of clinical and gene expression information for personalized prediction of disease  
6 outcomes. *P Natl Acad Sci Usa.* 101: 8431–8436.
- 7
- 8 15. Nevins JR, Huang ES, Dressman H, Pittman J, Huang AT, West M (2003): Towards  
9 integrated clinico-genomic models for personalized medicine: combining gene expression  
10 signatures and clinical factors in breast cancer outcomes prediction. *Hum Mol Genet.* 12: R153–  
11 R157.
- 12
- 13 16. Beane J, Sebastiani P, Whitfield TH, Steiling K, Dumas Y-M, Lenburg ME, Spira A (2008):  
14 A Prediction Model for Lung Cancer Diagnosis that Integrates Genomic and Clinical Features.  
15 *Cancer Prev Res.* 1: 56–64.
- 16
- 17 17. Dubois J, Adolphs R (2016): Building a Science of Individual Differences from fMRI.  
18 *Trends Cogn Sci.* 20: 425–443.
- 19
- 20 18. Yarkoni T, Westfall J (2017): Choosing Prediction Over Explanation in Psychology: Lessons  
21 From Machine Learning. *Perspect Psychol Sci.* 12: 1100–1122.
- 22
- 23 19. Lo A, Chernoff H, Zheng T, Lo S-H (2015): Why significant variables aren't automatically

- 1 good predictors. *Proc National Acad Sci.* 112: 13892–13897.
- 2
- 3 20. Bzdok D, Meyer-Lindenberg A (2017): Machine Learning for Precision Psychiatry:  
4 Opportunities and Challenges. *Biological Psychiatry Cognitive Neurosci Neuroimaging.* . doi:  
5 10.1016/j.bpsc.2017.11.007 .
- 6
- 7 21. Williams LM (2017): Defining biotypes for depression and anxiety based on large-scale  
8 circuit dysfunction: a theoretical review of the evidence and future directions for clinical  
9 translation. *Depress Anxiety.* 34: 9–24.
- 10
- 11 22. Williams LM (2016): Precision psychiatry: a neural circuit taxonomy for depression and  
12 anxiety. *Lancet Psychiatry.* 3: 472–480.
- 13
- 14 23. Poldrack RA, Congdon E, Triplett W, Gorgolewski KJ, Karlsgodt KH, Mumford JA, *et al.*  
15 (2016): A phenome-wide examination of neural and cognitive function. *Sci Data.* 3: 160110.
- 16
- 17 24. Consortium T, Anttila V, Bulik-Sullivan B, Finucane HK, Walters RK, Bras J, *et al.* (2018):  
18 Analysis of shared heritability in common disorders of the brain. *Science.* 360: eaap8757.
- 19
- 20 25. Hastie T, Tibshirani R, Friedman J (2009): *The elements of statistical learning: data mining,*  
21 *inference, and prediction*, 2nd ed. Springer.
- 22
- 23 26. Gheiratmand M, Rish I, Cecchi GA, Brown MR, Greiner R, Polosecki PI, *et al.* (2017):

- 1 Learning stable and predictive network-based patterns of schizophrenia and its clinical  
2 symptoms. *Npj Schizophrenia*. 3: 22.  
3  
4 27. Osuch E, Gao S, Wammes M, Théberge J, Willimason P, Neufeld R, *et al.* (2018):  
5 Complexity in mood disorder diagnosis: fMRI connectivity networks predicted medication-class  
6 of response in complex patients. *Acta Psychiat Scand.* . doi: 10.1111/acps.12945 .  
7  
8 28. Biswal BB, Mennes M, Zuo X-N, Gohel S, Kelly C, Smith SM, *et al.* (2010): Toward  
9 discovery science of human brain function. *Proc Natl Acad Sci*. 107: 4734–4739.  
10  
11 29. Gotts SJ, Simmons KW, Milbury LA, Wallace GL, Cox RW, Martin A (2012): Fractionation  
12 of social brain circuits in autism spectrum disorders. *Brain*. 135: 2711–2725.  
13  
14 30. Fischl B, Salat DH, Busa E, Albert M, Dieterich M, Haselgrove C, *et al.* (2002): Whole  
15 Brain Segmentation Automated Labeling of Neuroanatomical Structures in the Human Brain.  
16 *Neuron*. 33: 341–355.  
17  
18 31. Fischl B, Dale AM (2000): Measuring the thickness of the human cerebral cortex from  
19 magnetic resonance images. *Proc National Acad Sci*. 97: 11050–11055.  
20  
21 32. Desikan RS, Ségonne F, Fischl B, Quinn BT, Dickerson BC, Blacker D, *et al.* (2006): An  
22 automated labeling system for subdividing the human cerebral cortex on MRI scans into gyral  
23 based regions of interest. *Neuroimage*. 31: 968–980.



- 1
- 2 33. Cox RW (1996): AFNI: Software for Analysis and Visualization of Functional Magnetic  
3 Resonance Neuroimages. *Comput Biomed Res.* 29: 162–173.
- 4
- 5 34. Jo H, Saad ZS, Simmons KW, Milbury LA, Cox RW (2010): Mapping sources of correlation  
6 in resting state FMRI, with artifact detection and removal. *Neuroimage.* 52: 571–582.
- 7
- 8 35. Power JD, Cohen AL, Nelson SM, Wig GS, Barnes K, Church JA, *et al.* (2011): Functional  
9 Network Organization of the Human Brain. *Neuron.* 72: 665–678.
- 10
- 11 36. Tibshirani R (1996): Regression shrinkage and selection via the lasso. *Journal of the Royal*  
12 *Statistical Society, Series B.* 58: 267–288.
- 13
- 14 37. Zou H, Hastie T (2005): Regularization and variable selection via the elastic net. *J Royal*  
15 *Statistical Soc Ser B Statistical Methodol.* 67: 301–320.
- 16
- 17 38. Breiman L (2001): Random Forests. *Mach Learn.* 45: 5–32.
- 18
- 19 39. Reddan MC, Lindquist MA, Wager TD (2017): Effect Size Estimation in Neuroimaging.  
20 *Jama Psychiatry.* . doi: 10.1001/jamapsychiatry.2016.3356 .
- 21
- 22 40. Saeys Y, Inza I, Larrañaga P (2007): A review of feature selection techniques in  
23 bioinformatics. *Bioinformatics.* 23: 2507–2517.

- 1
- 2 41. Ojala M, Garriga GC (2010): Permutation Tests for Studying Classifier Performance.
- 3 *Journal of Machine Learning Research*. 11: 1833–1863.
- 4
- 5 42. Cenik B, Cenik C, Snyder MP, Brown SE (2017): Plasma sterols and depressive symptom
- 6 severity in a population-based cohort. *Plos One*. 12: e0184382.
- 7
- 8 43. Gao S, Calhoun VD, Sui J (2018): Machine learning in major depression: From classification
- 9 to treatment outcome prediction. *Cns Neurosci Ther*. . doi: 10.1111/cns.13048 .
- 10
- 11 44. Mateos-Pérez J, Dadar M, Lacalle-Aurioles M, Iturria-Medina Y, Zeighami Y, Evans AC
- 12 (2018): Structural neuroimaging as clinical predictor: A review of machine learning applications.
- 13 *Neuroimage Clin*. . doi: 10.1016/j.nicl.2018.08.019 .
- 14
- 15 45. Goodkind M, Eickhoff SB, Oathes DJ, Jiang Y, Chang A, Jones-Hagata LB, *et al.* (2015):
- 16 Identification of a Common Neurobiological Substrate for Mental Illness. *Jama Psychiatry*. 72:
- 17 305–315.
- 18
- 19 46. Chang LJ, Gianaros PJ, Manuck SB, Krishnan A, Wager TD (2015): A Sensitive and
- 20 Specific Neural Signature for Picture-Induced Negative Affect. *Plos Biol*. 13: e1002180.
- 21
- 22 47. Shen X, Finn ES, Scheinost D, Rosenberg MD, Chun MM, Papademetris X, Constable TR
- 23 (2017): Using connectome-based predictive modeling to predict individual behavior from brain

1 connectivity. *Nat Protoc.* 12: 506–518.

2

3 48. Yang Y, Zhong N, Imamura K, Lu S, Li M, Zhou H, *et al.* (2016): Task and Resting-State  
4 fMRI Reveal Altered Salience Responses to Positive Stimuli in Patients with Major Depressive  
5 Disorder. *Plos One.* 11: e0155092.

6

7 49. Zhang W-N, Chang S-H, Guo L-Y, Zhang K-L, Wang J (2013): The neural correlates of  
8 reward-related processing in major depressive disorder: A meta-analysis of functional magnetic  
9 resonance imaging studies. *J Affect Disorders.* 151: 531–539.

10

11 50. Li W, Mai X, Liu C (2014): The default mode network and social understanding of others:  
12 what do brain connectivity studies tell us. *Front Hum Neurosci.* 8: 74.

13

14 51. Mars RB, Neubert F-X, Noonan MP, Sallet J, Toni I, Rushworth MF (2012): On the  
15 relationship between the “default mode network” and the “social brain.” *Front Hum Neurosci.* 6:  
16 189.

17

18 52. Belleau EL, Taubitz LE, Larson CL (2015): Imbalance of default mode and regulatory  
19 networks during externally focused processing in depression. *Soc Cogn Affect Neur.* 10: 744–  
20 751.

21

22 53. Menon V (2015): Brain Mapping. *Syst.* 597–611.

23

- 1 54. Peterson A, Thome J, Frewen P, Lanius RA (2013): Resting-State Neuroimaging Studies: A  
2 New Way of Identifying Differences and Similarities among the Anxiety Disorders? *Can J*  
3 *Psychiatry*. 59: 294–300.  
4
- 5 55. Cole MW, Repovš G, Anticevic A (2014): The Frontoparietal Control System. *Neurosci*. 20:  
6 652–664.  
7
- 8 56. Sylvester CM, Corbetta M, Raichle ME, Rodebaugh TL, Schlaggar BL, Sheline YI, *et al.*  
9 (2012): Functional network dysfunction in anxiety and anxiety disorders. *Trends Neurosci*. 35:  
10 527–535.  
11
- 12 57. Chase HW, Phillips ML (2016): Elucidating Neural Network Functional Connectivity  
13 Abnormalities in Bipolar Disorder: Toward a Harmonized Methodological Approach. *Biological*  
14 *Psychiatry Cognitive Neurosci Neuroimaging*. 1: 288–298.  
15
- 16 58. Fischer AS, Keller CJ, Etkin A (2016): The Clinical Applicability of Functional Connectivity  
17 in Depression: Pathways Toward More Targeted Intervention. *Biological Psychiatry Cognitive*  
18 *Neurosci Neuroimaging*. 1: 262–270.  
19
- 20 59. Kaiser RH, Andrews-Hanna JR, Wager TD, Pizzagalli DA (2015): Large-Scale Network  
21 Dysfunction in Major Depressive Disorder: A Meta-analysis of Resting-State Functional  
22 Connectivity. *Jama Psychiatry*. 72: 603–611.  
23

- 1 60. Mayberg HS, Lozano AM, Voon V, McNeely HE, Seminowicz D, Hamani C, *et al.* (2005):  
2 Deep Brain Stimulation for Treatment-Resistant Depression. *Neuron*. 45: 651–660.  
3
- 4 61. Mayberg HS, Liotti M, Brannan SK, McGinnis S, Mahurin RK, Jerabek PA, *et al.* (1999):  
5 Reciprocal Limbic-Cortical Function and Negative Mood: Converging PET Findings in  
6 Depression and Normal Sadness. *Am J Psychiat*. 156: 675–682.  
7
- 8 62. Greicius MD, Flores BH, Menon V, Glover GH, Solvason HB, Kenna H, *et al.* (2007):  
9 Resting-State Functional Connectivity in Major Depression: Abnormally Increased Contributions  
10 from Subgenual Cingulate Cortex and Thalamus. *Biol Psychiat*. 62: 429–437.  
11
- 12 63. Spielberg JM, Beall EB, Hulvershorn LA, Altinay M, Karne H, Anand A (2016): Resting  
13 State Brain Network Disturbances Related to Hypomania and Depression in Medication-Free  
14 Bipolar Disorder. *Neuropsychopharmacol*. 41: 3016.  
15
- 16 64. Martino M, Magioncalda P, Huang Z, Conio B, Piaggio N, Duncan NW, *et al.* (2016):  
17 Contrasting variability patterns in the default mode and sensorimotor networks balance in bipolar  
18 depression and mania. *Proc National Acad Sci*. 113: 4824–4829.  
19
- 20 65. Cloninger RC, Svrakic DM, Przybeck TR (1993): A Psychobiological Model of  
21 Temperament and Character. *Arch Gen Psychiat*. 50: 975–990.  
22
- 23 66. Celikel F, Kose S, Cumurcu B, Erkorkmaz U, Sayar K, Borckardt JJ, Cloninger RC (2009):

1 Cloninger's temperament and character dimensions of personality in patients with major  
2 depressive disorder. *Compr Psychiat.* 50: 556–561.

3

4 67. Öngür D, Farabaugh A, Iosifescu DV, Perlis R, Fava M (2005): Tridimensional Personality  
5 Questionnaire Factors in Major Depressive Disorder: Relationship to Anxiety Disorder  
6 Comorbidity and Age of Onset. *Psychother Psychosom.* 74: 173–178.

7

8 68. Whitton AE, Treadway MT, Pizzagalli DA (2015): Reward processing dysfunction in major  
9 depression, bipolar disorder and schizophrenia. *Curr Opin Psychiatr.* 28: 7.

10

11 69. Woo C-W, Chang LJ, Lindquist MA, Wager TD (2017): Building better biomarkers: brain  
12 models in translational neuroimaging. *Nat Neurosci.* 20: 365–377.

13

14

15 **Table Captions:**

16

17 Table 1. Participant Demographics: Demographics for participants in the CNP dataset broken  
18 down by patient group.

19

20 Table 2. Predictive TCI questions for models of mood, anhedonia, and anxiety. Regression  
21 coefficients (ordered by magnitude) are either positive or negative indicating that a “True”  
22 answer for the the respective question increased or decreased the outcome variable score,  
23 respectively.

1

2 **Figure Captions:**

3 Figure 1. Modeling Approach. a) 126 sets of models were built to examine all permutations of 7  
4 feature set inputs, 3 modeling algorithms, and 6 outcome variables (symptom severity scores). b)  
5 The importance-weighted, forward selection approach to regression modeling involved an initial  
6 rank-ordering step for ordering features by importance, c) a forward-selection search step for  
7 building a series of models utilizing subsets of ordered features selected from the first step, and  
8 d) an evaluation step for evaluating each of these models using these candidate subsets according  
9 to a prespecified criterion to find the optimal model. An example predicting the total  
10 *Mood\_Bipolar* score using Elastic Net and scales+sMRI+fMRI as input shows how median MSE  
11 (left, top) and median  $r^2$  (left, bottom) varies with each feature subset, each with standard  
12 deviation bars. Measured v. predicted outcome scores (right) show how closely the model  
13 predictions are to actual outcome scores for individuals in the held-out sample.

14

15 Figure 2. Measured v. predicted values for best models for (A) mood, (B) anhedonia, and (C)  
16 anxiety. Each dot in scatter plot represents a single subject from the held-out evaluation set and  
17 their measured symptom severity score (x-axis) and predicted score (y-axis). The dashed  
18 diagonal line represents a perfect 1-to-1 linear relationship between measured and predicted  
19 values. Thus, comparing measured v. predicted outcome scores shows how closely the model  
20 predictions are to actual outcome scores for individuals in the held-out samples for this set of  
21 models.

22

1 Figure 3. Best median  $r^2$  for the best models for each outcome variable. Models selected were  
2 using Scales+sMRI+fMRI as the input feature set and Elastic Net. Next to each outcome  
3 variable, the corresponding number of non-zero features ( $p$ ) returned by the model appears.

4  
5 Figure 4. Proportions of feature types in best models. A) Proportion of all features returned by  
6 the model. Blue represents proportion of features from scales, orange represents proportion from  
7 fMRI connectivity measures, and green represents proportion from sMRI measures. B)  
8 Proportion of feature types in the top 25% of features returned by the model showing that most  
9 models have equal or greater proportion of scale features than among all the non-zero features.

10  
11 Figure 5. Proportion of features from each scale for the best model predicting (A) mood, (B)  
12 anhedonia, and (C) anxiety. Of the features returned by the best model that were scale items,  
13 each pie chart shows the proportion of those items that were from the corresponding scales for  
14 the model for each outcome variable. For example, for the *Mood/Dep\_Hopkins* model, 31% of  
15 the scale items were from the *TCI* scale, 6% from the *Chaphyp* scale, etc. Note that this  
16 representation of features does not show the sign of the regression coefficient and whether  
17 predictive features indicate increasing or decreasing symptom severity.

18  
19 Figure 6. Connectivity Matrices and ROI locations for fMRI connectivity features of best models  
20 predicting mood (A and B), anhedonia (C and D), and anxiety (E and F) outcome variables. For  
21 all non-zero fMRI connectivity features returned by the respective model, the number of  
22 individual edges between two nodes is plotted in the connectivity matrix for that model (left plot  
23 in each panel). Each row and column represent a single resting-state network (RSN) from the



1 Power atlas. Thus, darker squares represent more features within or between the given networks  
2 with actual feature number superimposed numerically on each square. Upper and lower triangles  
3 show redundant information. Cortical surface plots (right plot in each panel) show the ROI  
4 locations colored by RSN membership for each model to display the breadth of networks with  
5 informative features for each model. Note that since only cortical surfaces are shown, no  
6 cerebellar nodes were plotted in the brain plots. Network labels are AUD: Auditory, CER:  
7 Cerebellar, COTC: Cingulo-opercular Task Control, DM: Default Mode, DA: Dorsal Attention,  
8 FPTC: Fronto-parietal Task Control, MEM: Memory Retrieval, SAL: Saliience, SSM-H:  
9 Sensory/somatomotor Hand, SSM-M: Sensory/somatomotor Mouth, SUB: Subcortical, UNC:  
10 Uncertain (i.e., miscellaneous regions not assigned to a specific RSN), VA: Ventral Attention,  
11 VIS: Visual.

12

13

14 **Tables:**

15

1 Table 1. Participant Demographics.

|                                   | <b>HC</b> | <b>SCZ</b> | <b>BD</b> | <b>ADHD</b> | <b>Total</b> |
|-----------------------------------|-----------|------------|-----------|-------------|--------------|
| No. of subjects                   | 130       | 50         | 49        | 43          | 272          |
| With complete phenotype data      | 130       | 50         | 48        | 43          | 271          |
| With sMRI data**                  | 98        | 30         | 44        | 34          | 206          |
| With fMRI data <sup>†</sup>       | 104       | 47         | 41        | 37          | 229          |
| <b>Age</b>                        |           |            |           |             |              |
| Mean age                          | 31.26     | 36.46      | 35.15     | 33.09       |              |
| SD age                            | 8.74      | 8.88       | 9.07      | 10.76       |              |
| Range age                         | 21-50     | 22-49      | 21-50     | 21-50       |              |
| <b>Gender</b>                     |           |            |           |             |              |
| No. of female subjects            | 62        | 12         | 21        | 22          |              |
| Percent female subjects           | 47.69%    | 24.00%     | 42.86%    | 51.16%      |              |
| <b>Race</b>                       |           |            |           |             |              |
| American Indian or Alaskan Native | 19.23%    | 22.00%     | 6.25%     | 0%          |              |
| Asian                             | 15.38%    | 2.00%      | 0%        | 2.33%       |              |
| Black/African American            | 0.77%     | 4.00%      | 2.08%     | 2.33%       |              |
| White                             | 78.46%    | 66.00%     | 77.08%    | 88.37%      |              |
| More than one race                | 0%        | 2.00%      | 14.58%    | 6.98%       |              |
| <b>Education</b>                  |           |            |           |             |              |
| No high school                    | 1.54%     | 18.00%     | 2.08%     | 0%          |              |
| High school                       | 12.31%    | 44.00%     | 29.17%    | 23.26%      |              |
| Some college                      | 20.77%    | 18.00%     | 25.00%    | 30.23%      |              |
| Associate's degree                | 7.69%     | 4.00%      | 6.25%     | 6.98%       |              |
| Bachelor's degree                 | 50.00%    | 10.00%     | 29.17%    | 32.56%      |              |
| Graduate degree                   | 6.92%     | 0%         | 4.17%     | 2.33%       |              |
| Other                             | 0.77%     | 4.00%      | 4.17%     | 4.65%       |              |

\* Demographic information is based on initial number of subjects

\*\* Excluding subjects with aliasing artifacts

<sup>†</sup> Excluding subjects with misaligned structural-function imaging data

2

3

1 Table 2. Predictive TCI questions for models of mood, anhedonia, and anxiety.

| Outcome Variable         | Regression Coefficient | CNP Question Label | True/False Question                                                                                                               |
|--------------------------|------------------------|--------------------|-----------------------------------------------------------------------------------------------------------------------------------|
| <i>Mood/Dep_Hopkins</i>  | 0.06                   | tci149t            | I often stop what I am doing because I get worried, even when my friends tell me everything will go well.                         |
|                          | -0.05                  | tci76p             | I am more hard-working than most people.                                                                                          |
|                          | 0.04                   | tci92t             | I need much extra rest, support, or reassurance to recover from minor illnesses or stress.                                        |
|                          | 0.02                   | tci22t             | I have less energy and get tired more quickly than most people.                                                                   |
|                          | -0.01                  | tci210t            | People find it easy to come to me for help, sympathy, and warm understanding.                                                     |
| <i>Mood_Bipolar</i>      | 0.17                   | tci140p            | I often give up on a job if it takes much longer than I thought it would.                                                         |
|                          | 0.07                   | tci12t             | I often feel tense and worried in unfamiliar situations, even when others feel there is little to worry about.                    |
|                          | 0.06                   | tci81t             | Usually I am more worried than most people that something might go wrong in the future.                                           |
|                          | 0.05                   | tci217t            | I usually feel tense and worried when I have to do something new and unfamiliar.                                                  |
|                          | 0.04                   | tci53t             | I lose my temper more quickly than most people.                                                                                   |
| <i>Anhedonia_Chapphy</i> | 0.77                   | tci217t            | I usually feel tense and worried when I have to do something new and unfamiliar.                                                  |
|                          | -0.52                  | tci5p              | I like a challenge better than easy jobs.                                                                                         |
|                          | 0.52                   | tci156t            | I don't go out of my way to please other people.                                                                                  |
|                          | 0.47                   | tci120t            | I find sad songs and movies pretty boring.                                                                                        |
|                          | 0.25                   | tci83t             | I feel it is more important to be sympathetic and understanding of other people than to be practical and tough-minded.            |
| <i>Anhedonia_Chapsac</i> | -1.19                  | tci117t            | I would like to have warm and close friends with me most of the time.                                                             |
|                          | 1.18                   | tci231t            | I usually stay away from social situations where I would have to meet strangers, even if I am assured that they will be friendly. |
|                          | -0.79                  | tci21t             | I like to discuss my experiences and feelings openly with friends instead of keeping them to myself.                              |
|                          | 0.57                   | tci44t             | It wouldn't bother me to be alone all the time.                                                                                   |
|                          | 0.55                   | tci46t             | I don't care very much whether other people like me or the way I do things.                                                       |
|                          | -0.48                  | tci210t            | People find it easy to come to me for help, sympathy, and warm understanding.                                                     |
|                          | 0.37                   | tci201t            | Even when I am with friends, I prefer not to "open up" very much.                                                                 |
|                          | 0.34                   | tci180t            | I usually like to stay cool and detached from other people.                                                                       |
| <i>Anxiety_Hopkins</i>   | 0.05                   | tci141t            | Even when most people feel it is not important, I often insist on things being done in a strict and orderly way.                  |
|                          | 0.05                   | tci27t             | I often avoid meeting strangers because I lack confidence with people I do not know.                                              |
|                          | 0.04                   | tci180t            | I usually like to stay cool and detached from other people.                                                                       |
| <i>Anxiety_Bipolar</i>   | -0.25                  | tci157t            | I am not shy with strangers at all.                                                                                               |
|                          | 0.25                   | tci54t             | When I have to meet a group of strangers, I am more shy than most people.                                                         |
|                          | 0.23                   | tci81t             | Usually I am more worried than most people that something might go wrong in the future.                                           |
|                          | 0.16                   | tci129t            | I often feel tense and worried in unfamiliar situations, even when others feel there is no danger at all.                         |
|                          | -0.14                  | tci3t              | I am often moved deeply by a fine speech or poetry.                                                                               |
|                          | 0.10                   | tci211t            | I am slower than most people to get excited about new ideas and activities.                                                       |

2

1

2 **Figures:**

3

4

5

6

7

# 1 Figure 1. Modeling Approach

## A) Modeling Inputs, Algorithms, Outputs

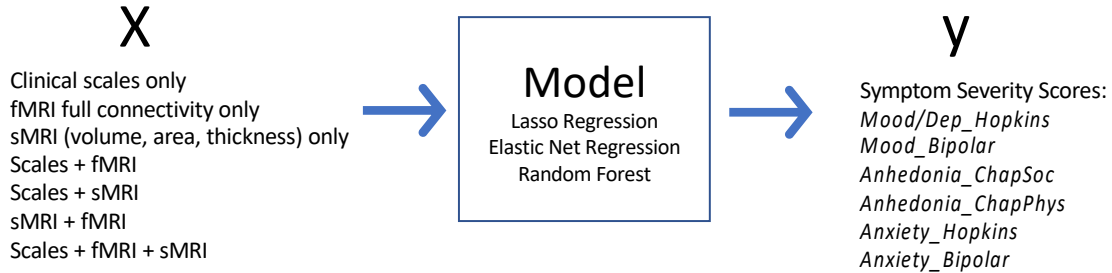

## B) Initial rank-ordering step

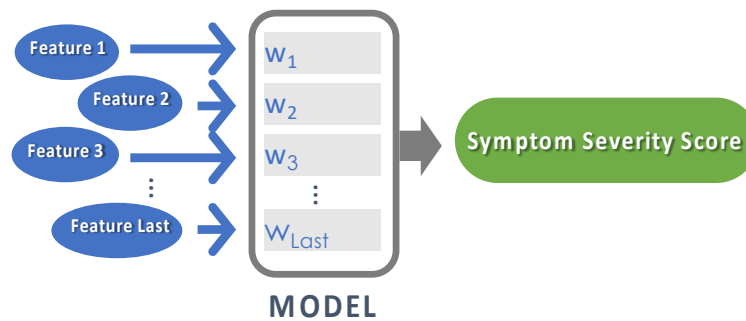

## C) Forward-selection search step

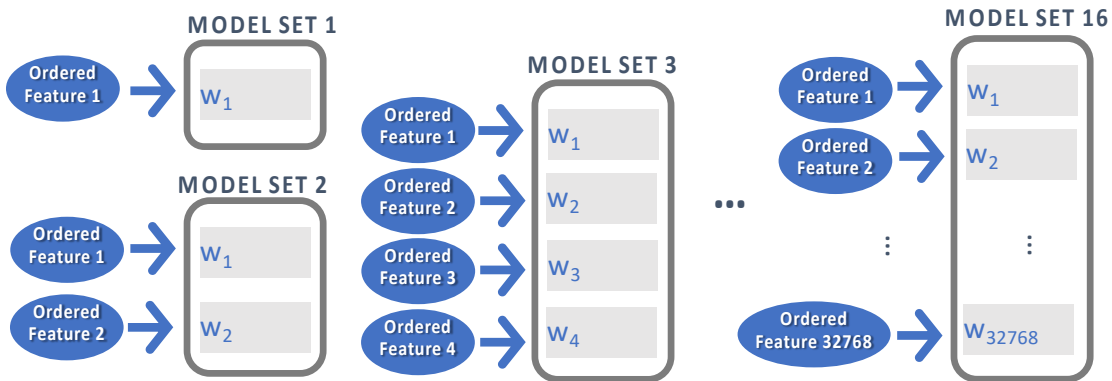

## D) Evaluation step

Example: Modeling *bipolar\_mood* with scales+sMRI+fMRI using Elastic Net

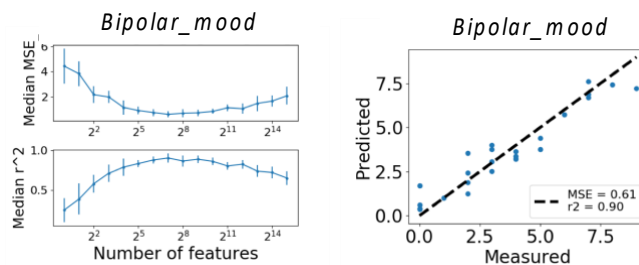

1 Figure 2. Measured v. predicted values for best models for mood, anhedonia, and anxiety.

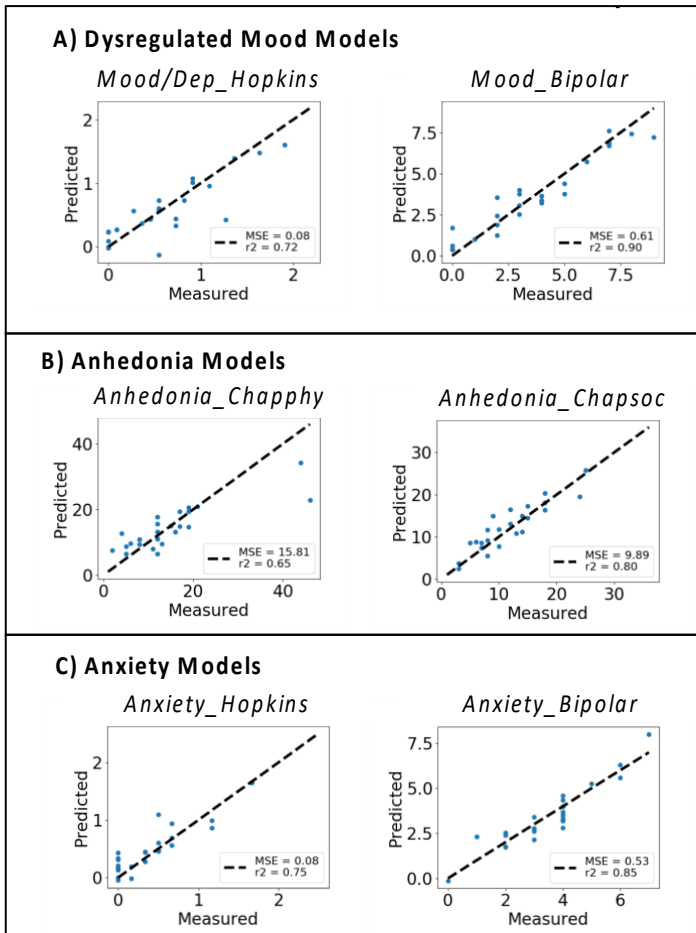

2

1 Figure 3. Best median  $r^2$  for the best models for each outcome variable.

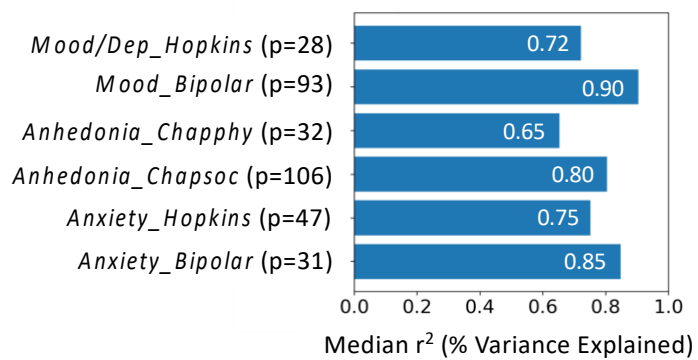

2

1 Figure 4. Proportions of feature types in best models.

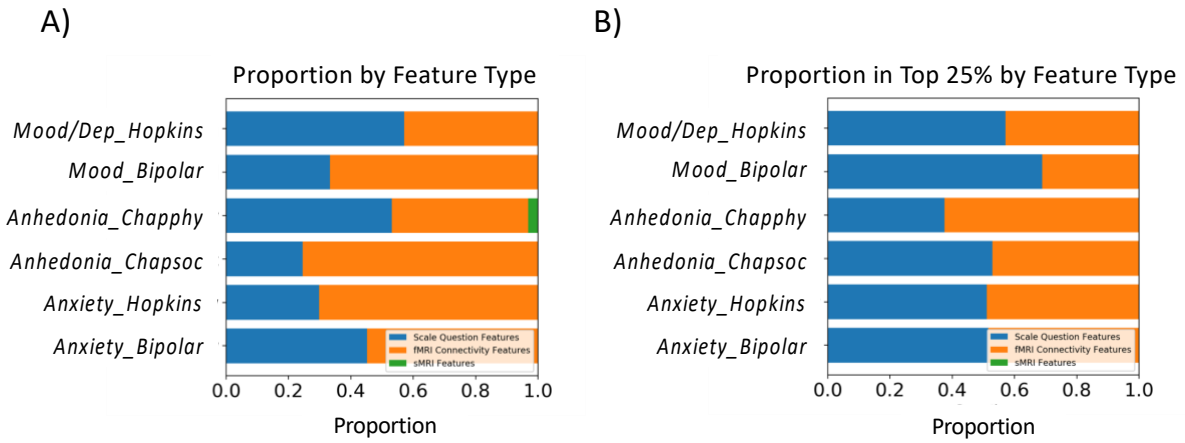



- 1 Figure 5. Proportion of features from each scale for the best model predicting each outcome
- 2 variable.

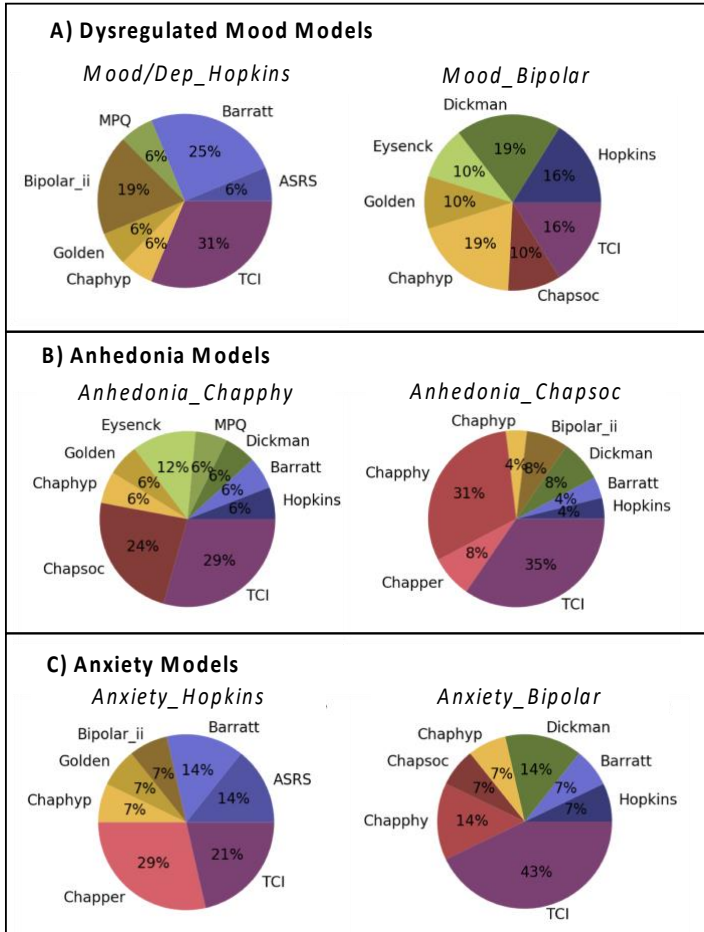

Source: https://www.biorxiv.org/content/10.1101/414037v1.full.pdf
